# Supplementary material for: Transcriptomic and Metabolic Responses to a Live-Attenuated Francisella tularensis Vaccine
Source: MDPI journal article supplement (doi:10.3390/vaccines8030412), 2020-07-24

A

Color Key

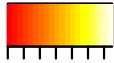

0 0.03  
Value

Pathway Enrichment Heatmap  
KEGG Pathways

Day 1 Day 2 Day 7 Day 14

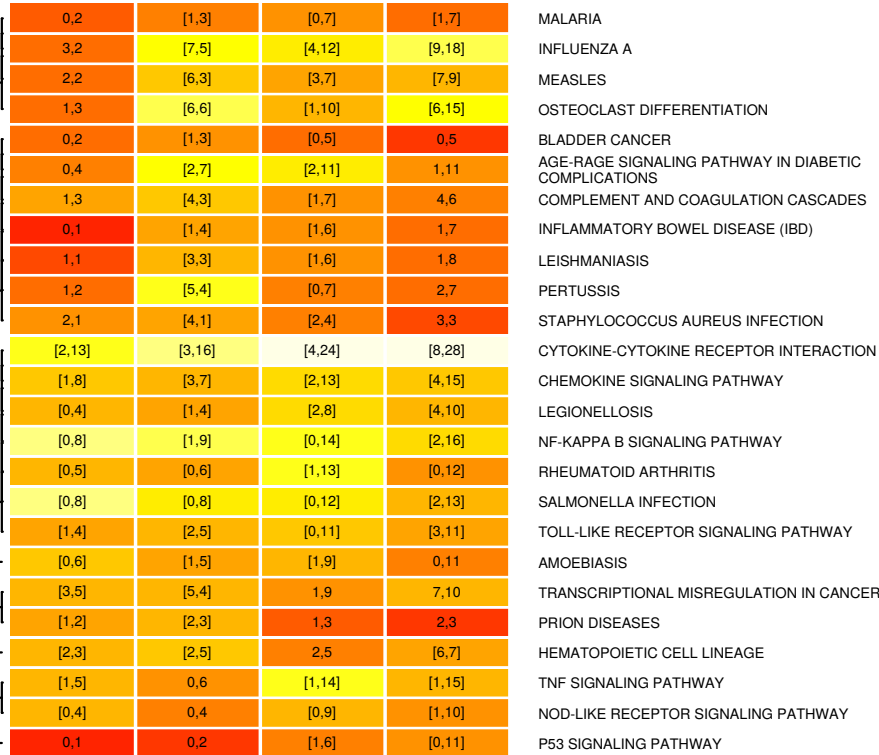

B

Color Key

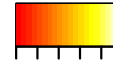

0 0.06  
Value

Pathway Enrichment Heatmap  
Blood Transcription Modules

Day 1 Day 2 Day 7 Day 14

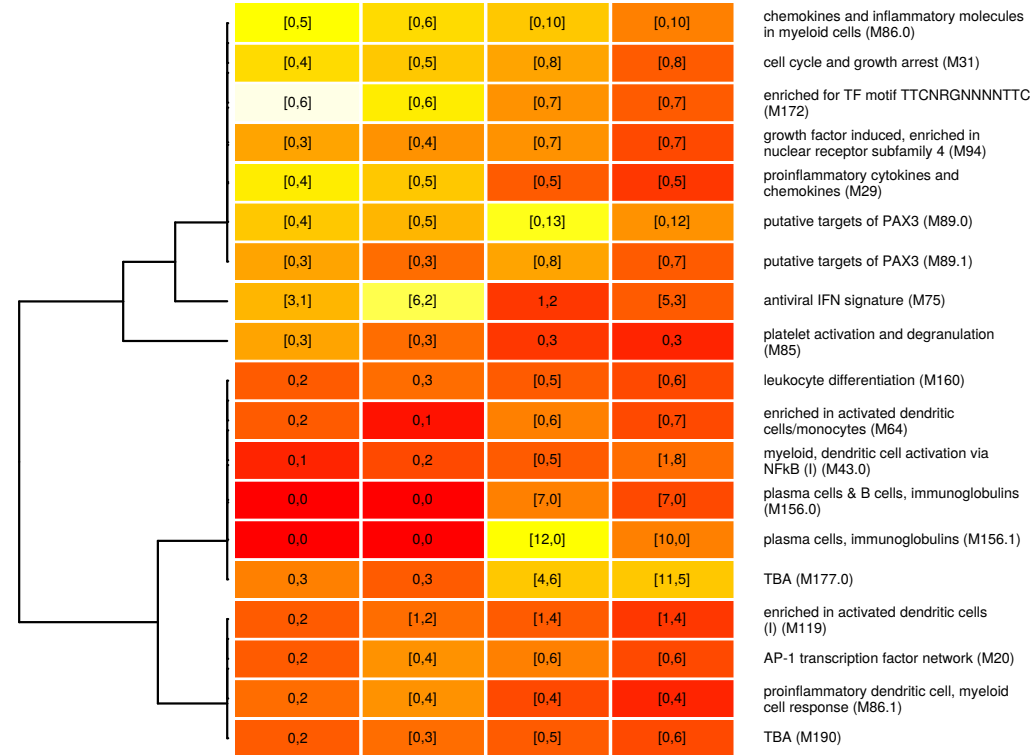

Supplement: s1 [file s1]
