# Supplementary material for: Transcriptomic and Metabolic Responses to a Live-Attenuated Francisella tularensis Vaccine
Source: MDPI journal article supplement (doi:10.3390/vaccines8030412), 2020-07-24
Supplement: s1 [file s1]

Metabolite Baseline Response Heatmap  
HILIC LC Column, Day 2

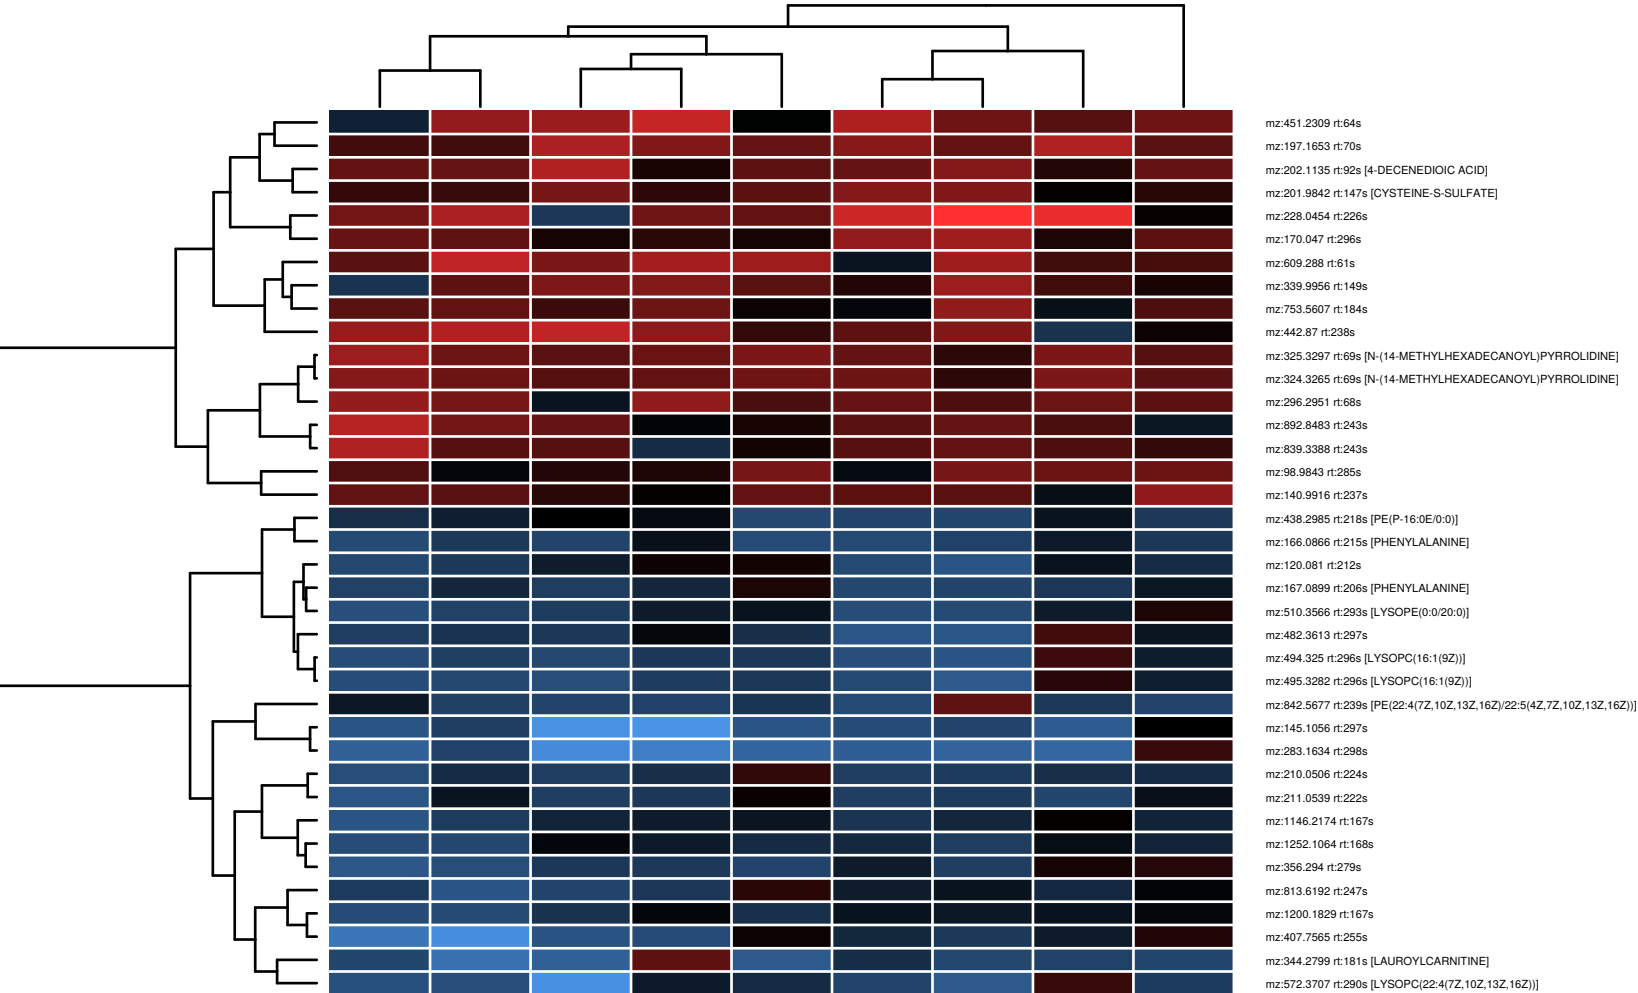

Log<sub>2</sub> Fold Change From Baseline

■ <-3 ■ -2 ■ -1 ■ 0 ■ 1 ■ 2 ■ ≥3
