# Supplementary material for: Transcriptomic and Metabolic Responses to a Live-Attenuated Francisella tularensis Vaccine
Source: MDPI journal article supplement (doi:10.3390/vaccines8030412), 2020-07-24

Day 1, HILIC LC Column  
Microagglutination titer

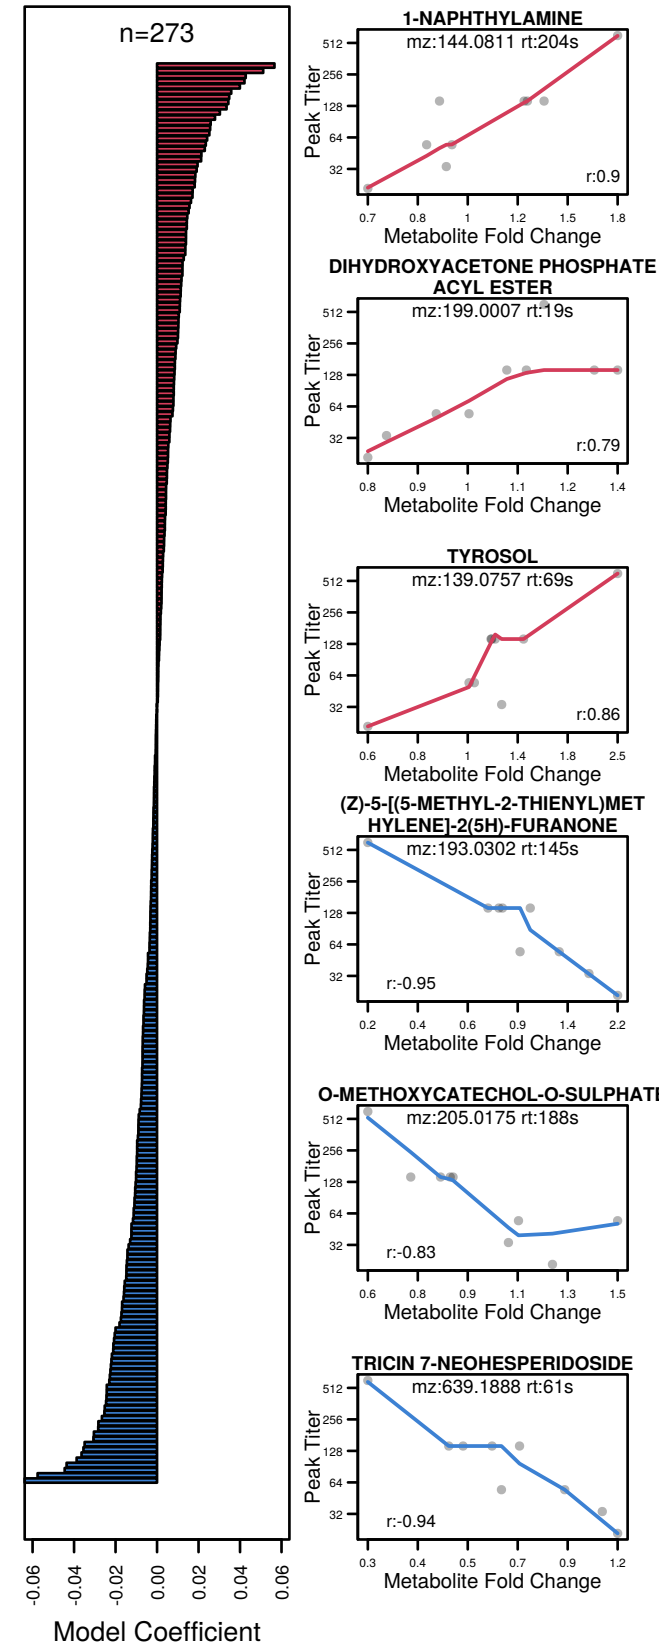

Day 2, HILIC LC Column  
Microagglutination titer

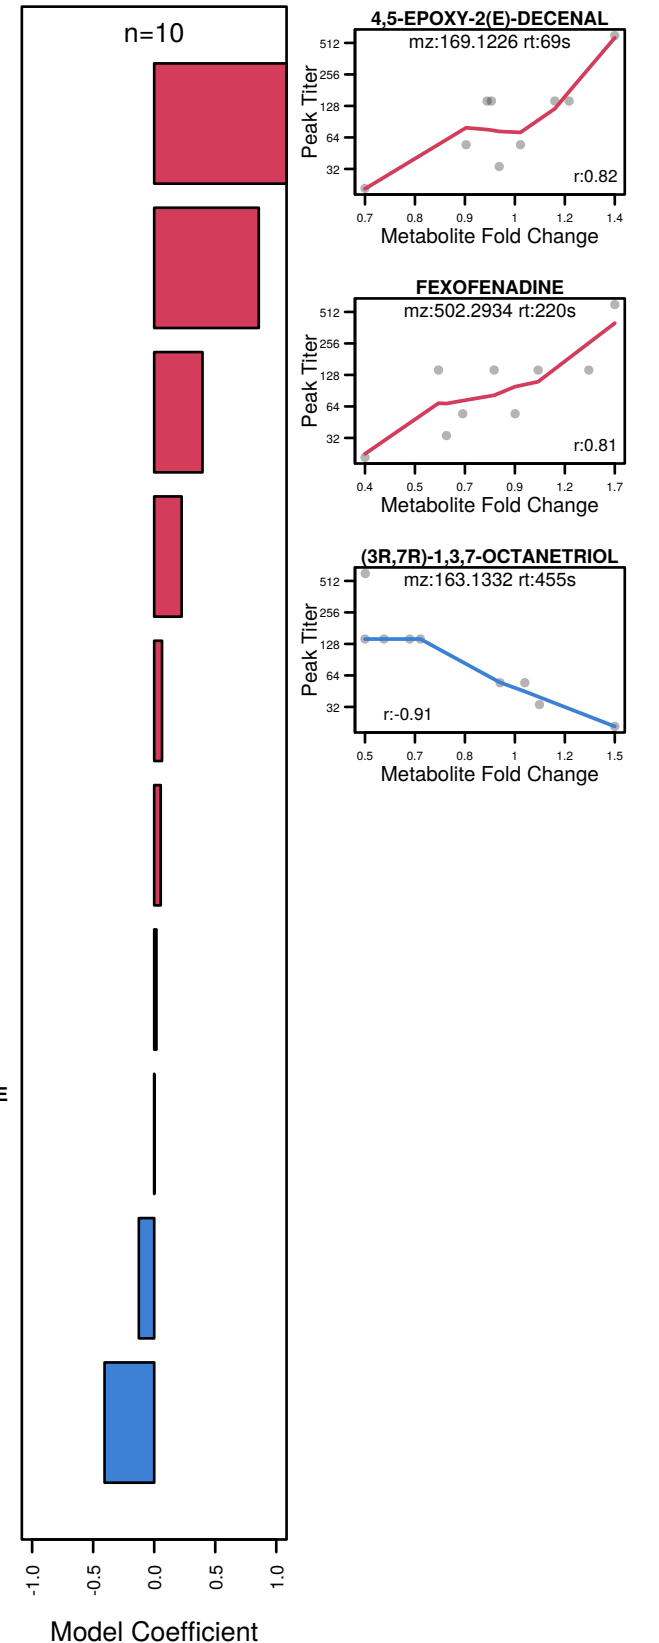

Day 7, HILIC LC Column  
Microagglutination titer

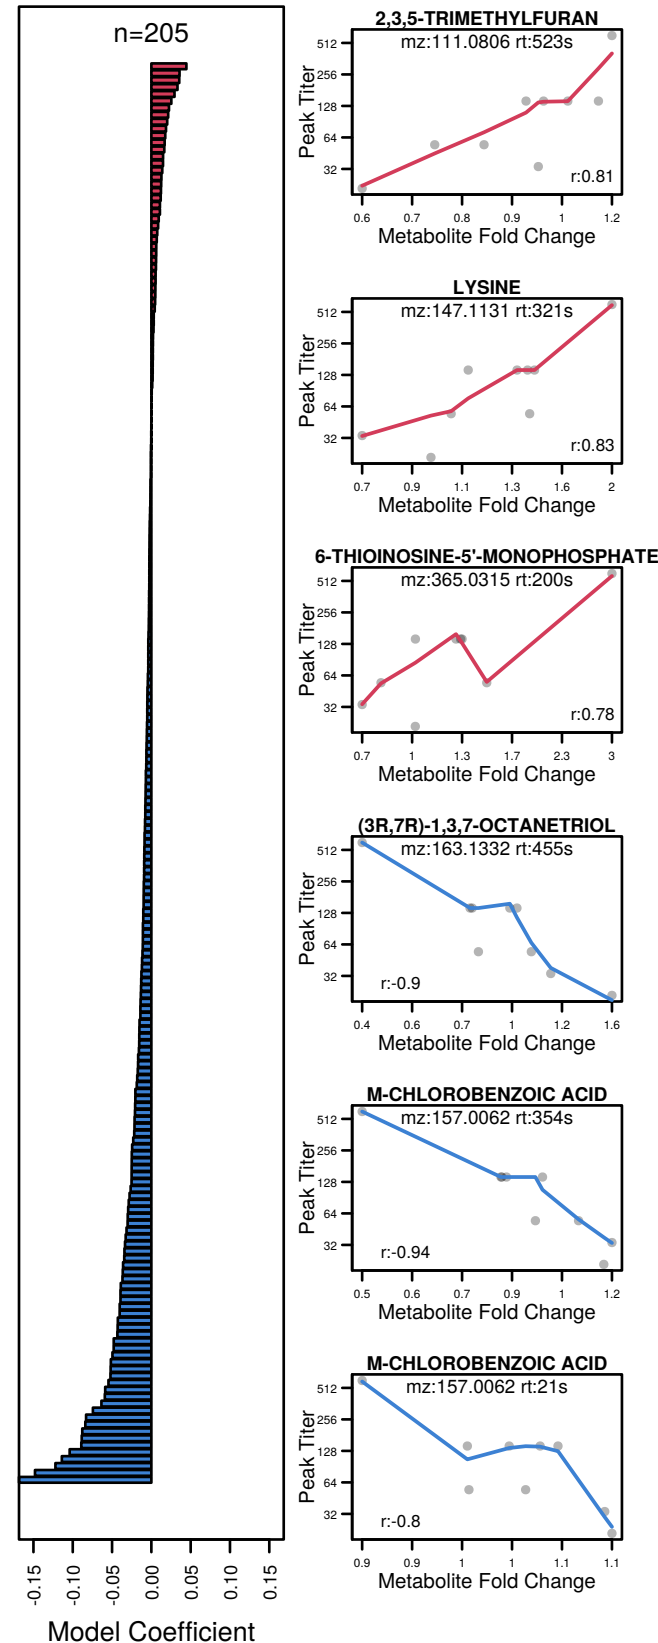

Day 14, HILIC LC Column  
Microagglutination titer

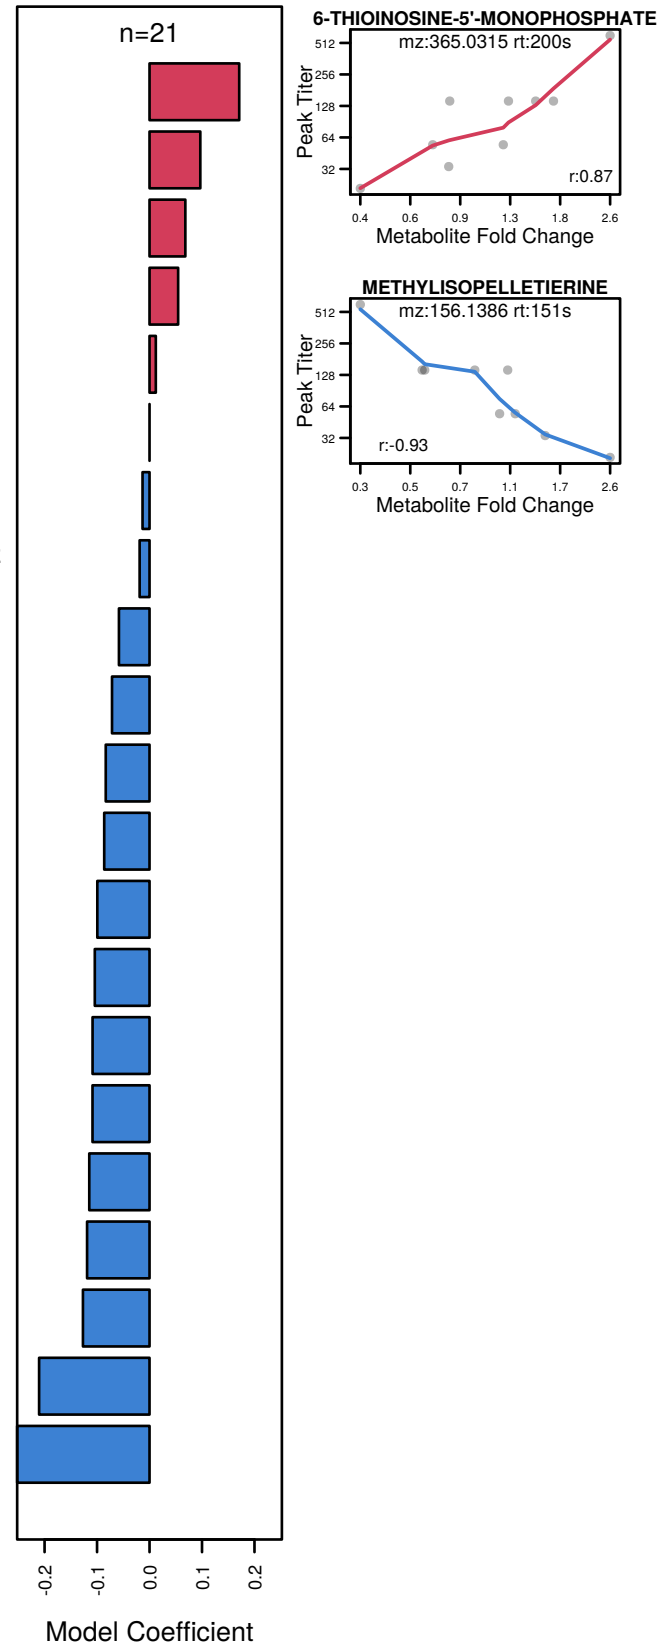

Supplement: s1 [file s1]
