# Supplementary material for: Transcriptomic and Metabolic Responses to a Live-Attenuated Francisella tularensis Vaccine
Source: MDPI journal article supplement (doi:10.3390/vaccines8030412), 2020-07-24

+ P-value < 0.05 &  
 Fold Change >= 1.2  
 \* P-value < 0.05

## A Targeted Amino Acids

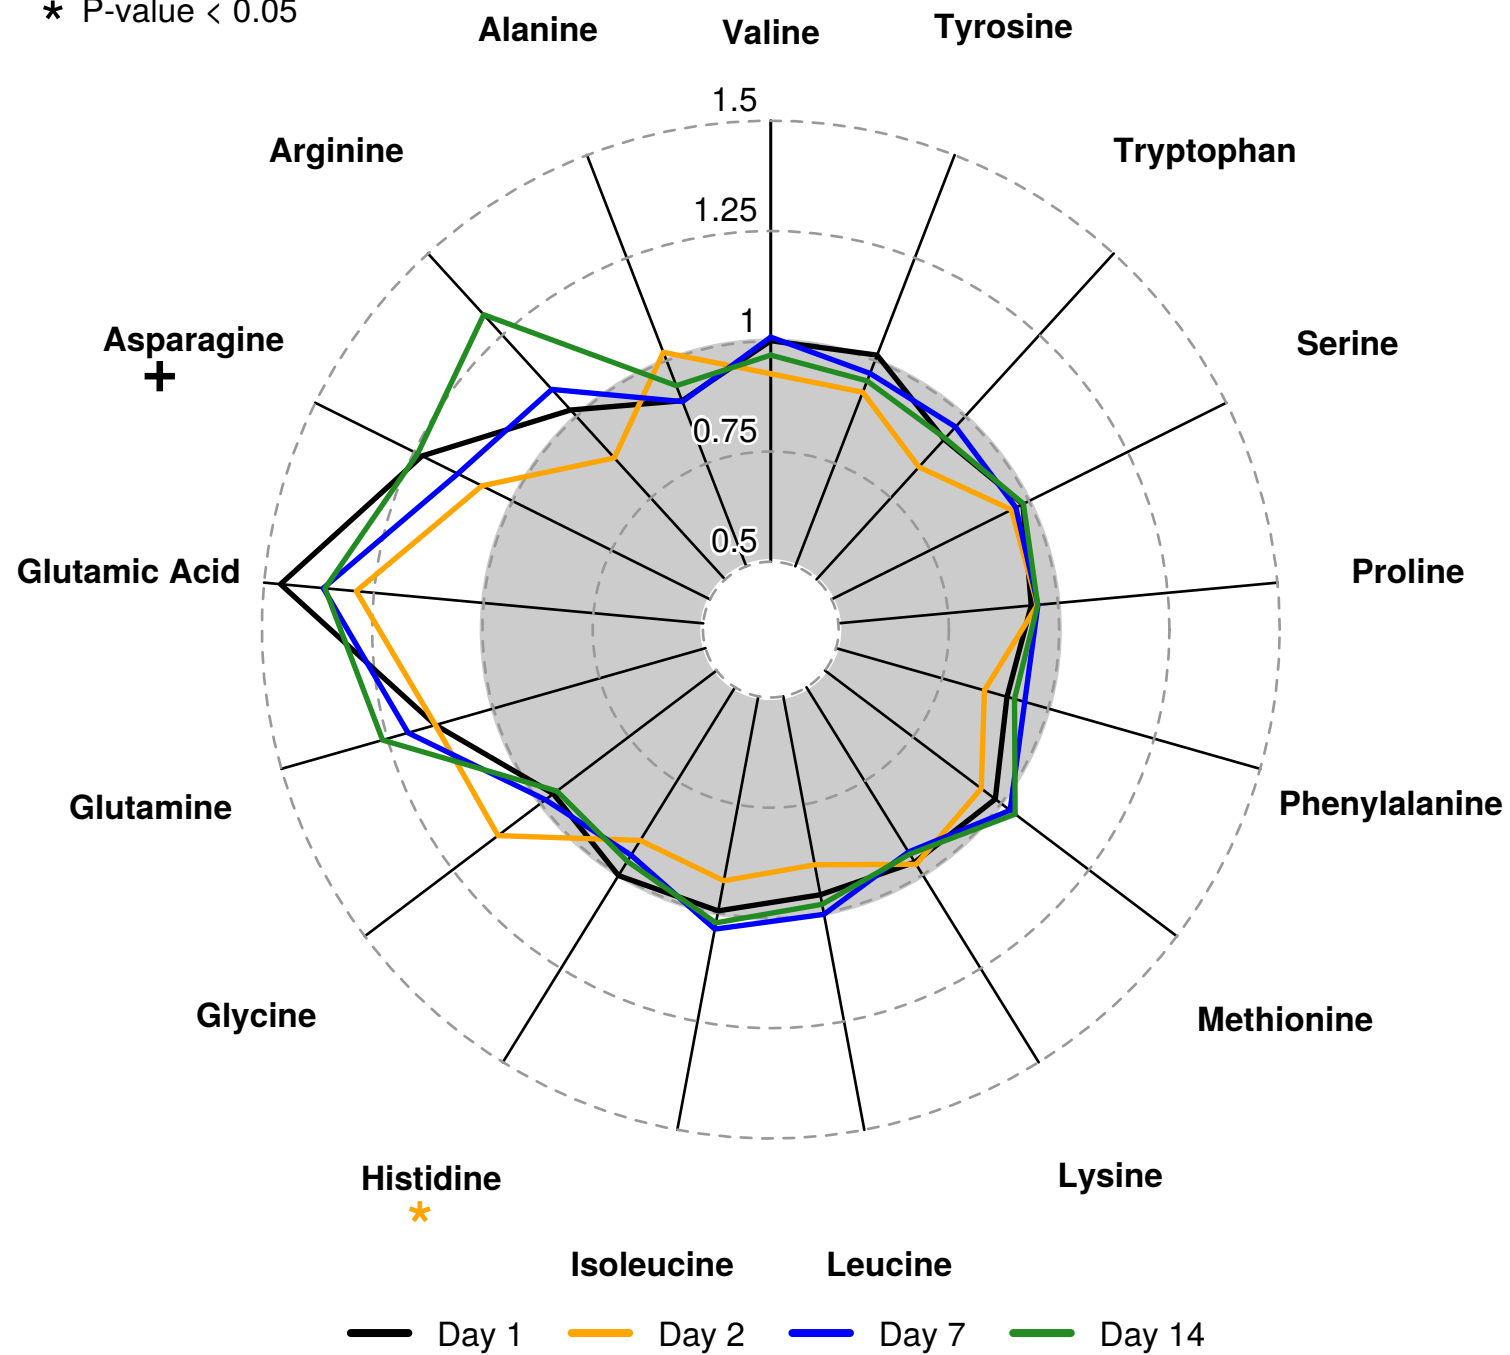

+ P-value < 0.05 &  
 Fold Change >= 1.2  
 \* P-value < 0.05

## B Targeted Organic Acids

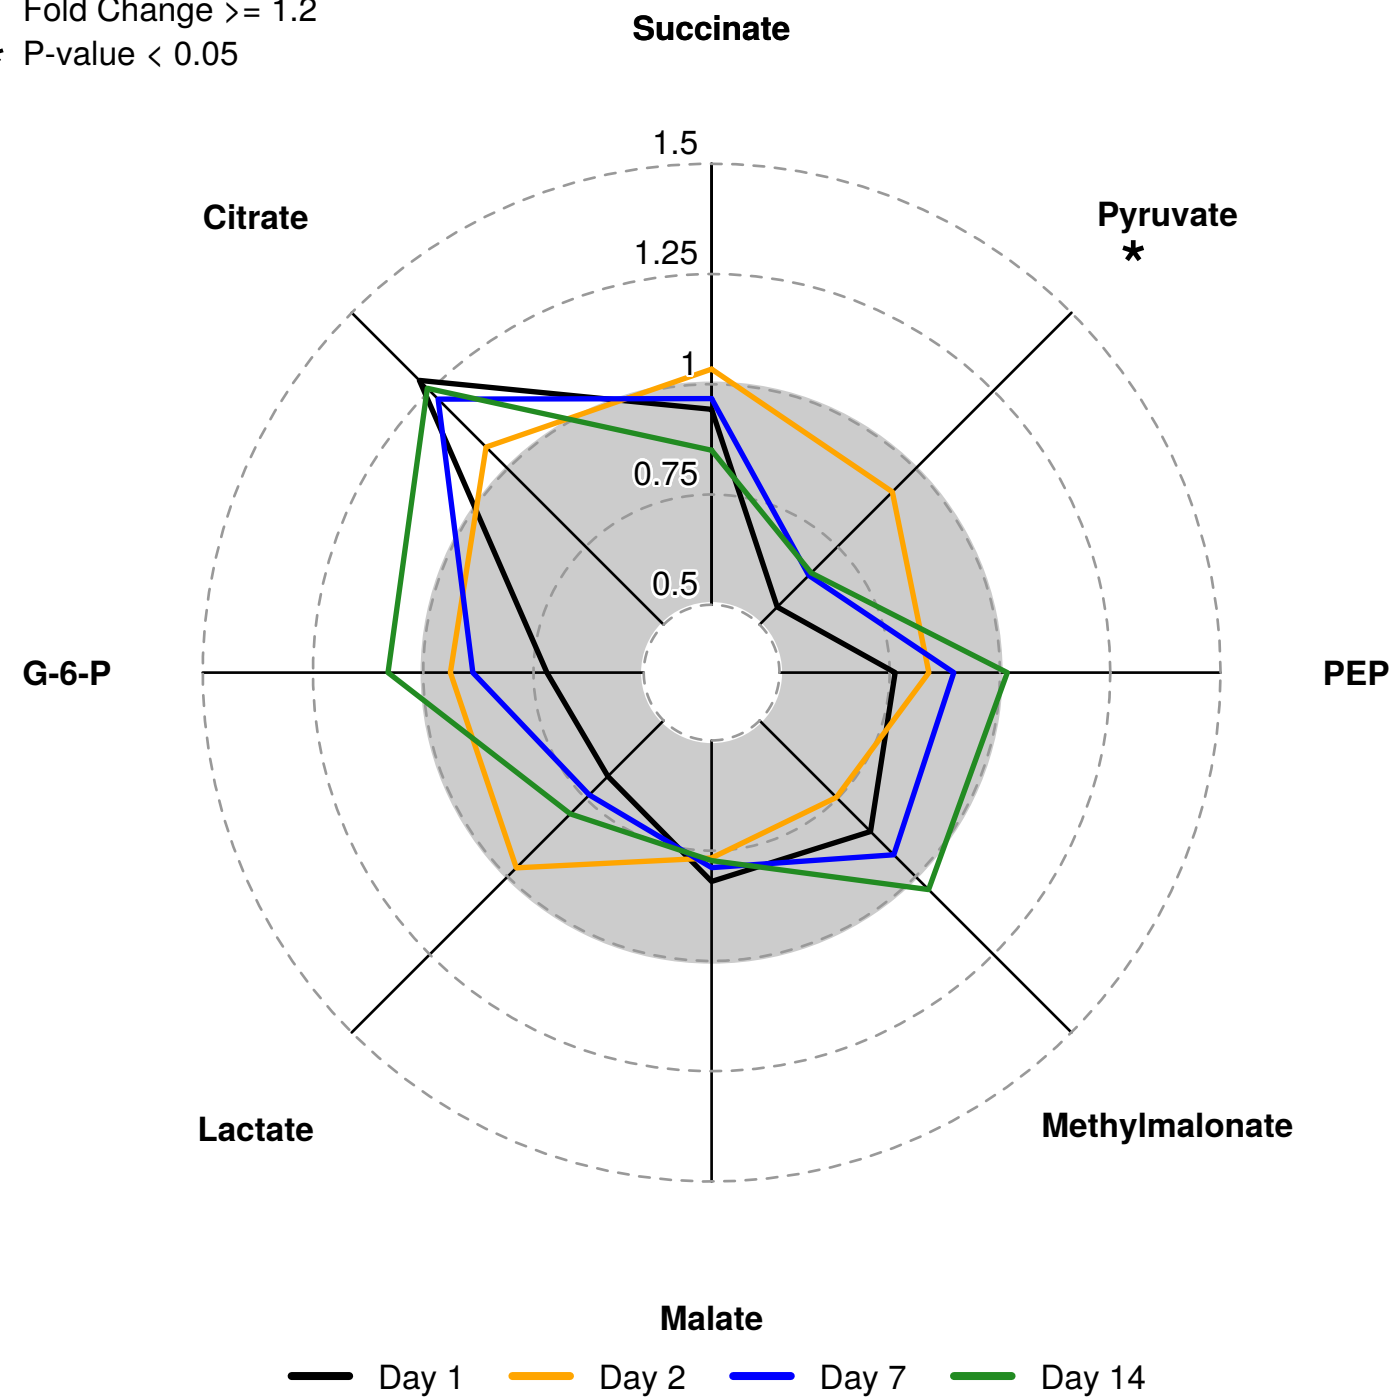

Supplement: s1 [file s1]
