# Supplementary figures and images for: Transcriptomic and Metabolic Responses to a Live-Attenuated Francisella tularensis Vaccine
Source: MDPI journal article supplement (doi:10.3390/vaccines8030412), 2020-07-24

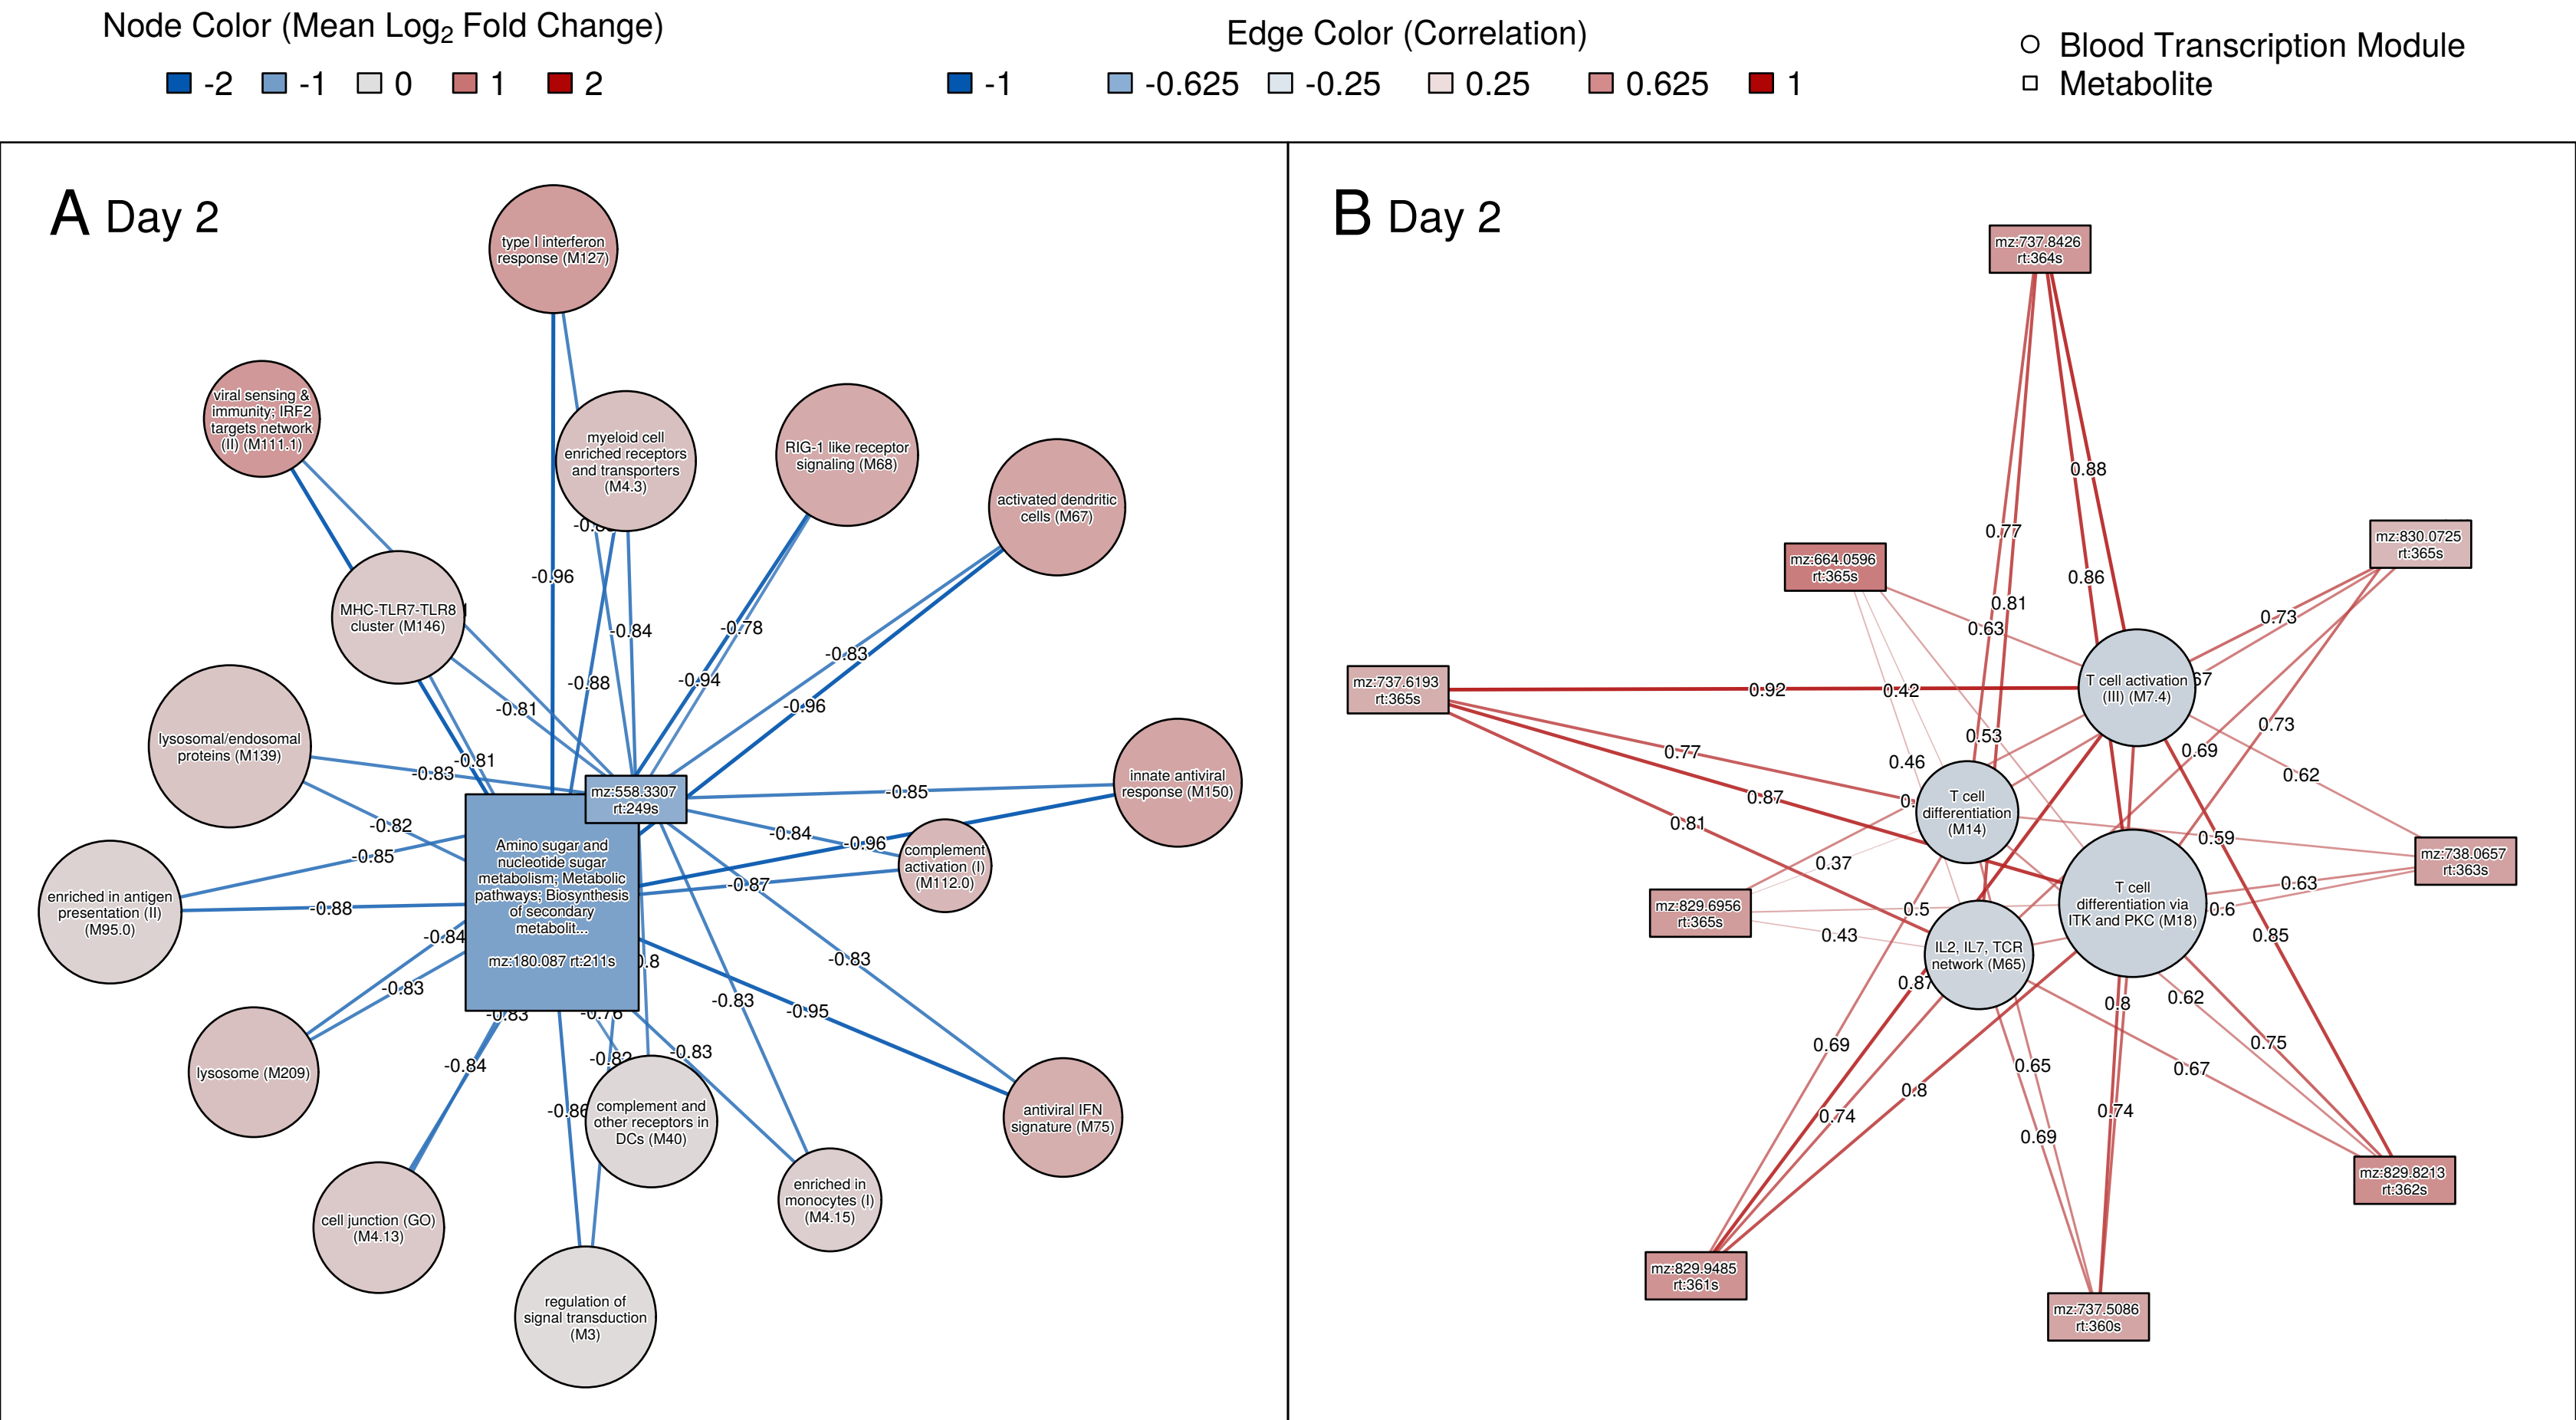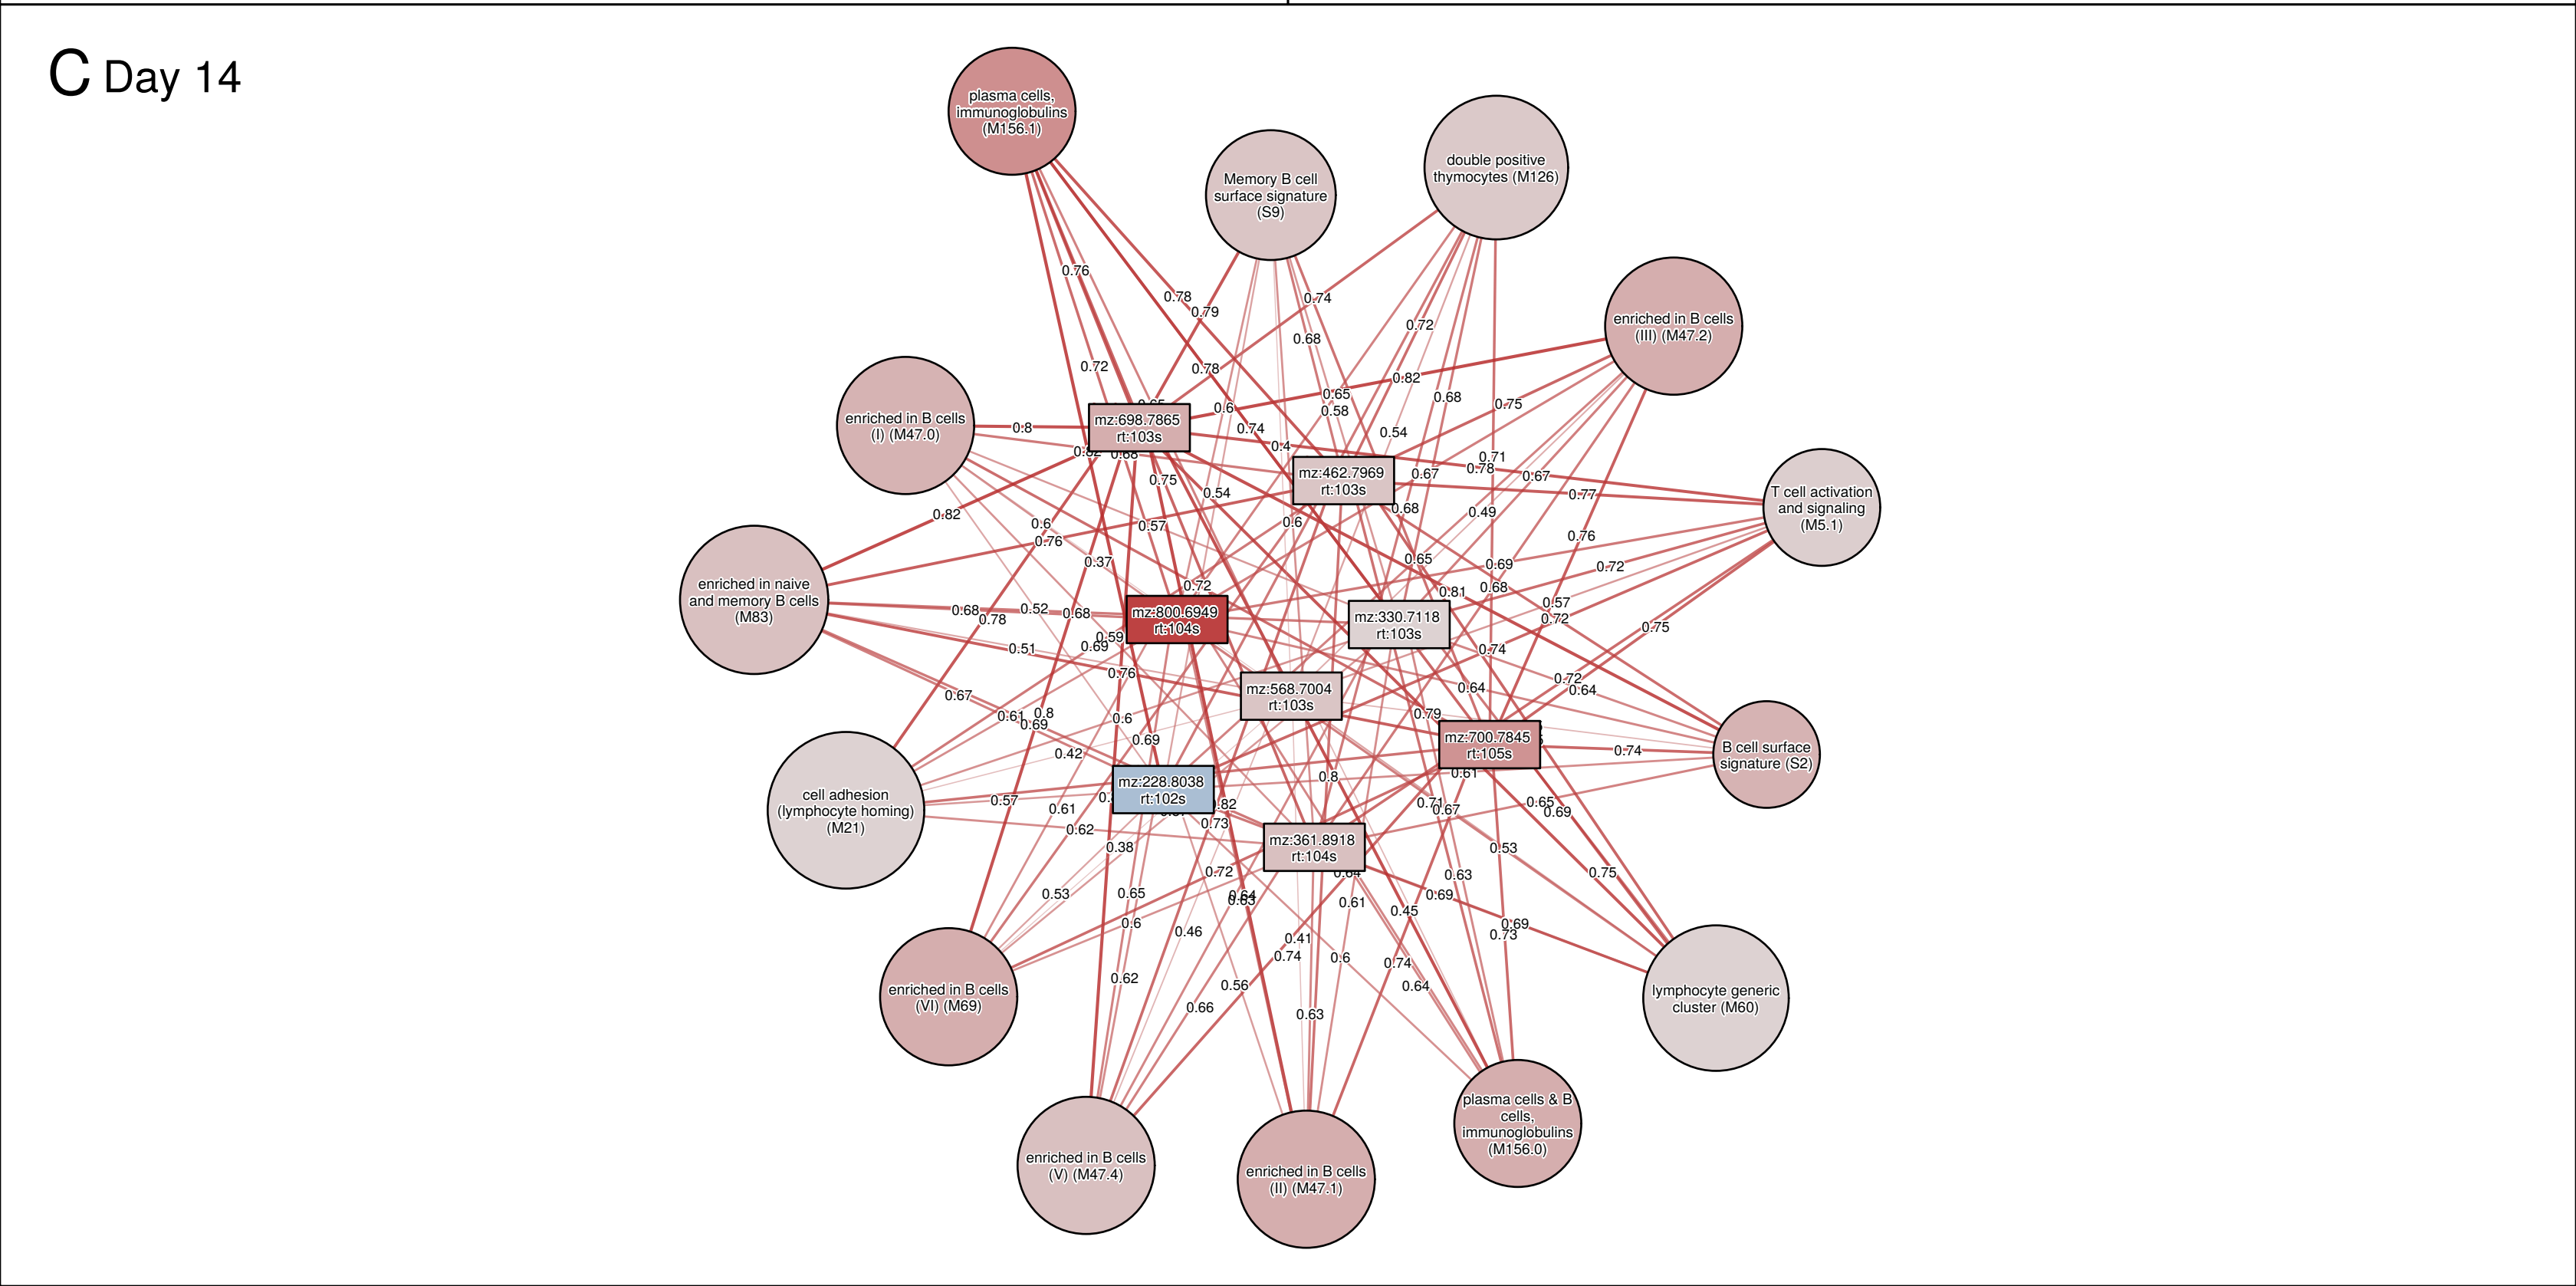

Supplement: s1 [file s1]

A

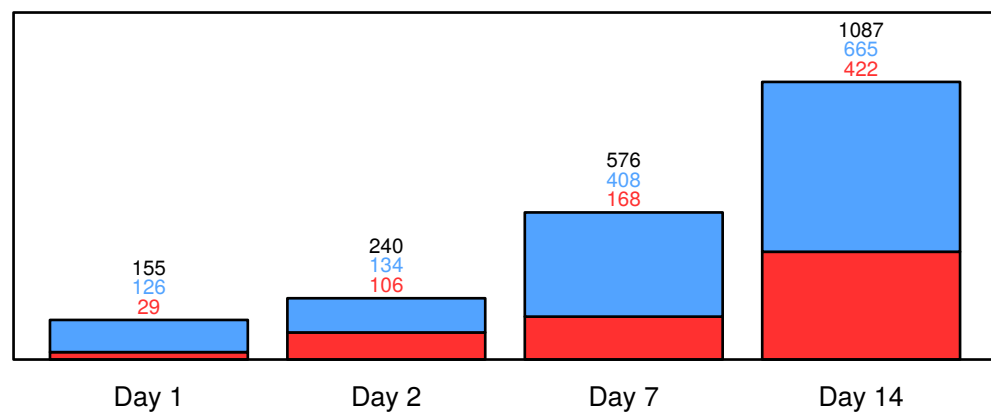

B

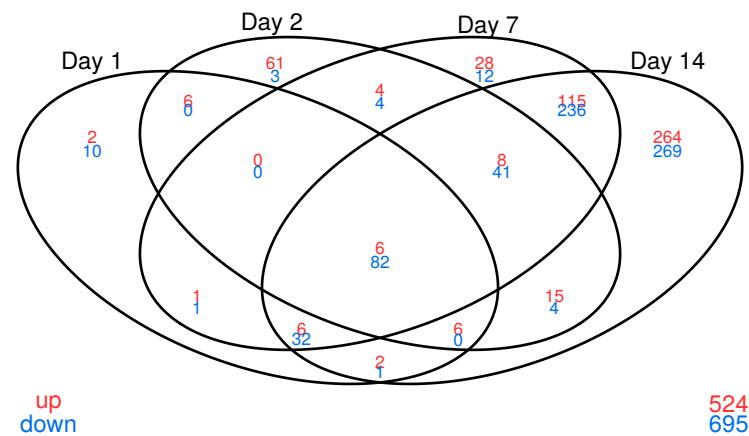

C

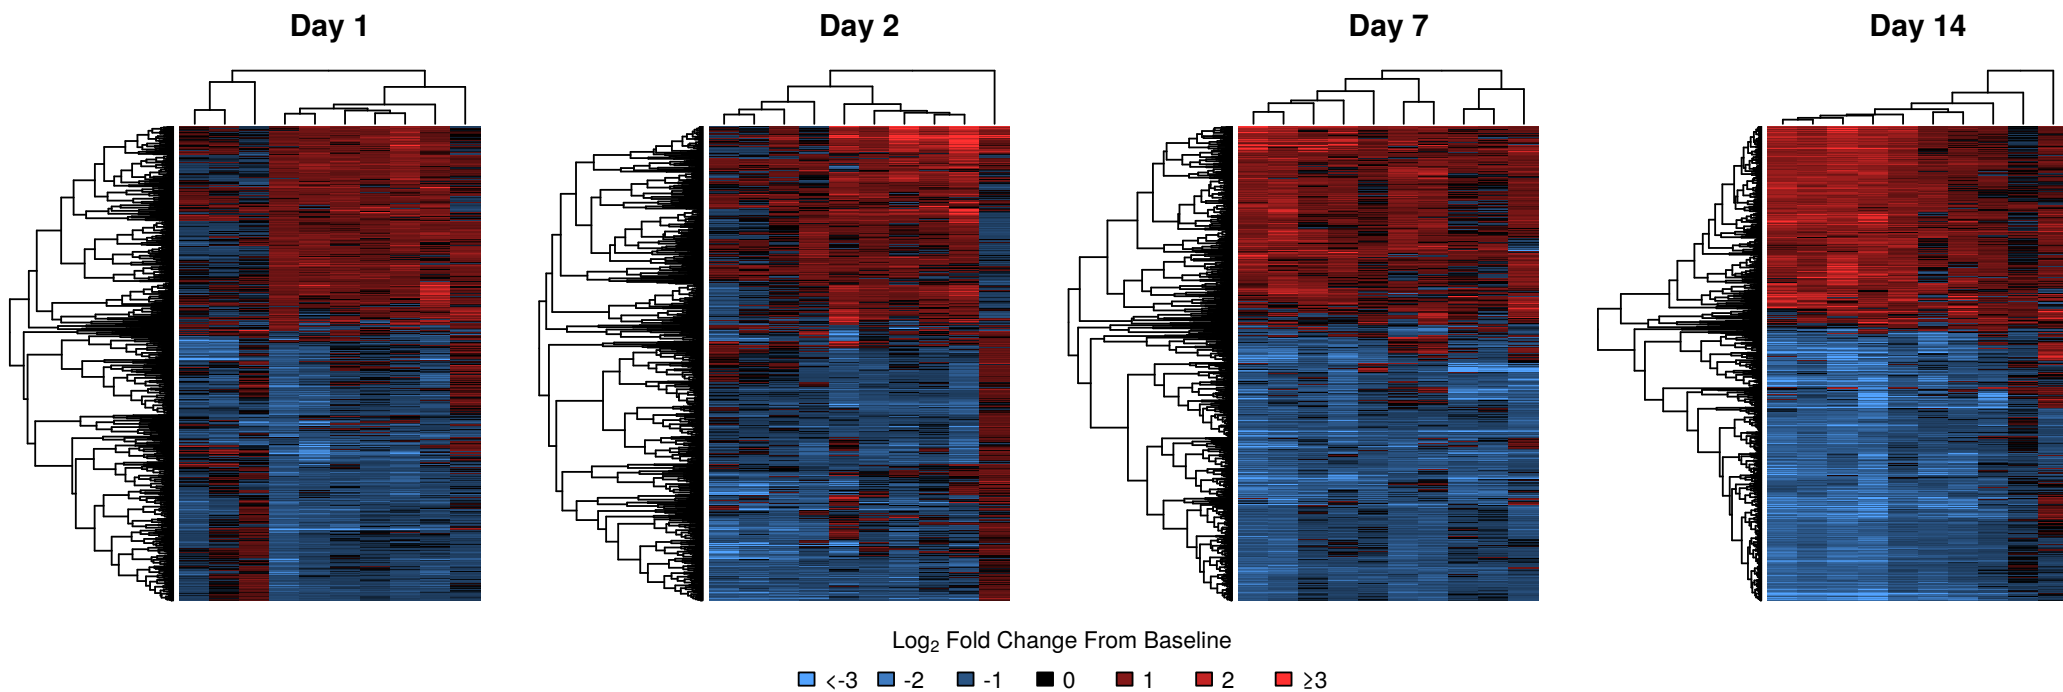

Supplement: s1 [file s1]

A

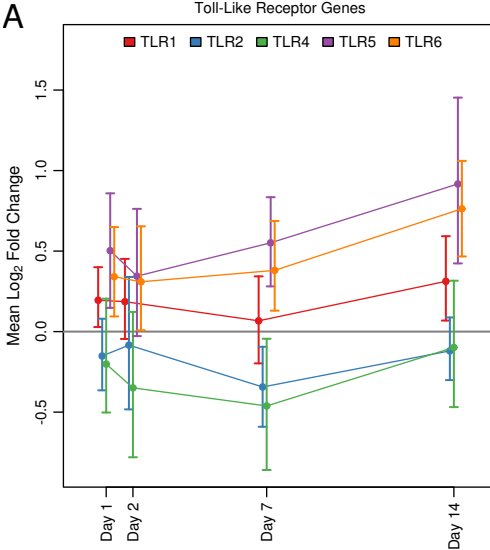

B

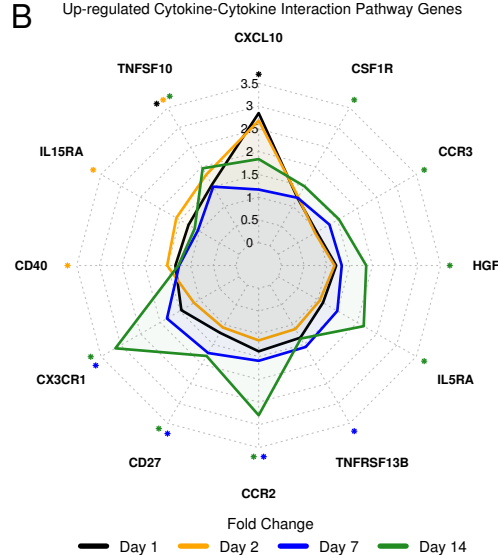

C

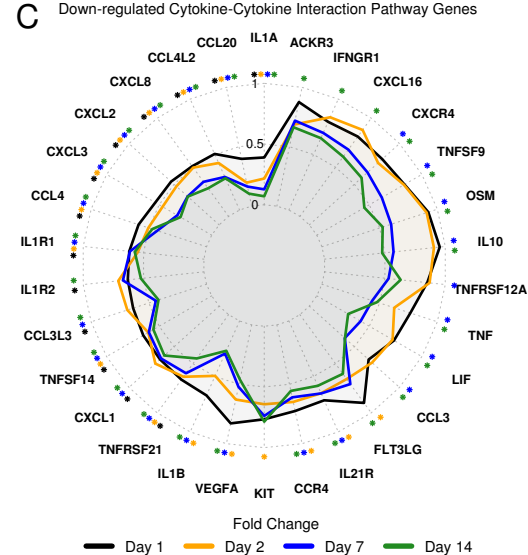

Supplement: s1 [file s1]
